# Supplementary material for: Evolutionary Patterns of Intersexual Power
Source: MDPI journal article supplement (doi:10.3390/ani13233695), 2023-11-29
Supplement: s1 [file s1]

Figure S1. Phylogenetic tree

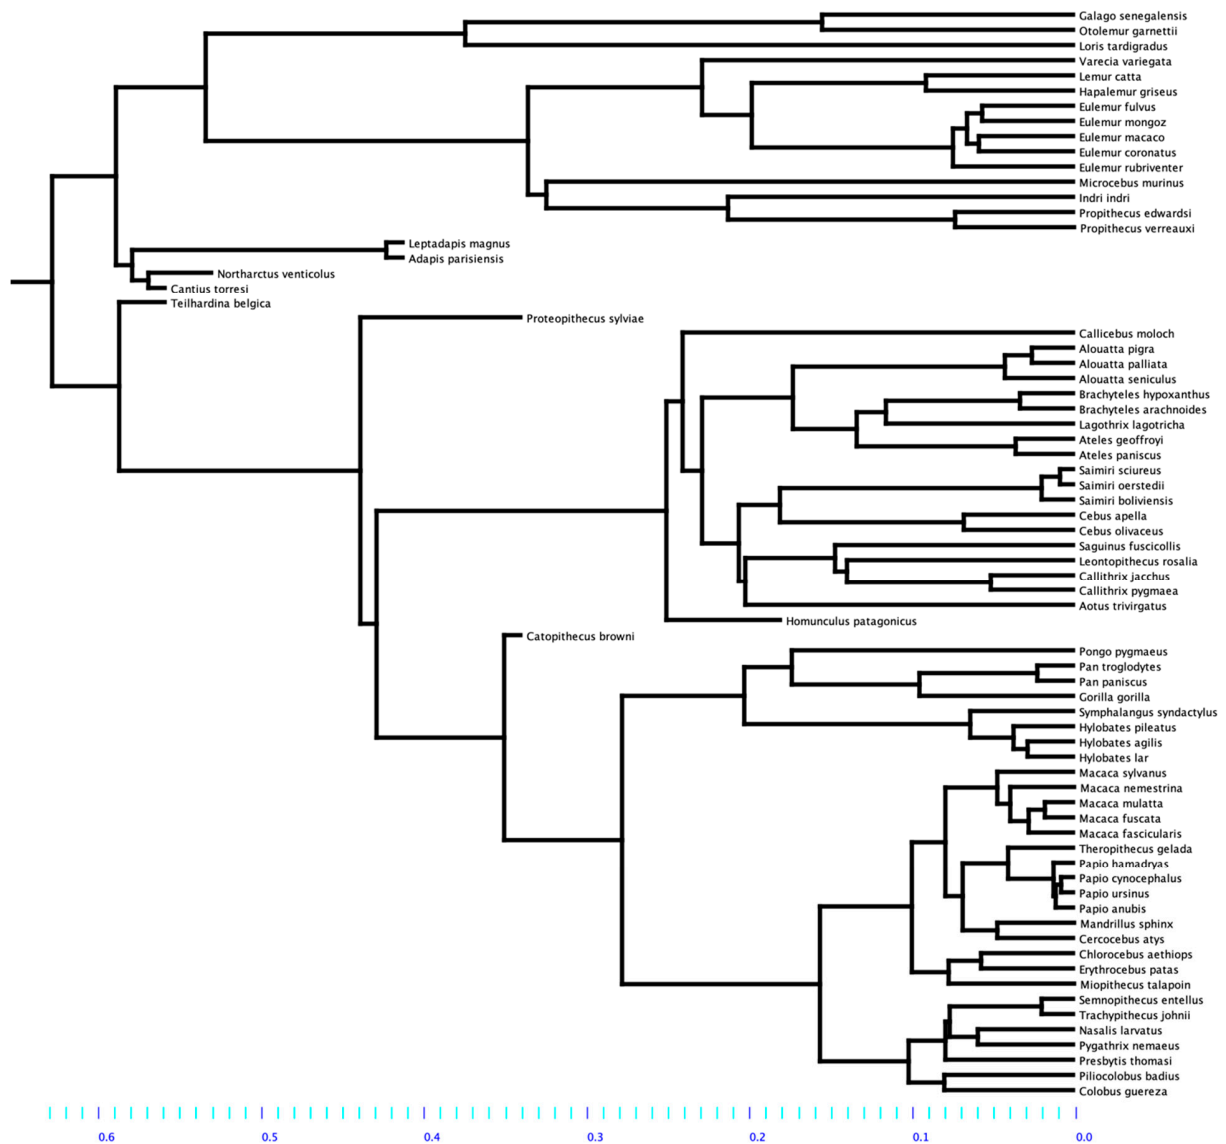

Phylogenetic tree (above) generated using the Nexus file (below) employed in ancestral state reconstructions of canine ratio. In the scale at bottom, 0.1 = 10 million years before present. See main text for details regarding estimated clade divergence times.

#NEXUS

[written Tue May 03 11:42:50 EDT 2016 by Mesquite version 2.74 (build 550) at Ashley-Gosselin-Ildaris-MacBook-Pro-2.local/192.168.0.63]

BEGIN TAXA;

TITLE Taxa;

DIMENSIONS NTAX=72;

TAXLABELS

Galago\_senegalensis Otolemur\_garnettii Loris\_tardigradus Varecia\_variegata  
Lemur\_catta Hapalemur\_griseus Eulemur\_fulvus Eulemur\_mongoz Eulemur\_macaco  
Eulemur\_coronatus Eulemur\_rubriventer Microcebus\_murinus Indri\_indri  
Propithecus\_edwardsi Propithecus\_verreauxi Callicebus\_moloch Alouatta\_pigra  
Alouatta\_palliata Alouatta\_seneculus Brachyteles\_hypoxanthus Brachyteles\_arachnoides  
Lagothrix\_lagotricha Ateles\_geoffroyi Ateles\_paniscus Saimiri\_sciureus Saimiri\_oerstedii  
Saimiri\_boliviensis Cebus\_apella Cebus\_olivaceus Saguinus\_fuscicollis Leontopithecus\_rosalia  
Callithrix\_jacchus Callithrix\_pygmaea Aotus\_trivirgatus Pongo\_pygmaeus Pan\_troglodytes  
Pan\_paniscus Gorilla\_gorilla Symphalangus\_syndactylus Hylobates\_pileatus Hylobates\_agilis  
Hylobates\_lar Macaca\_sylvanus Macaca\_nemestrina Macaca\_mulatta Macaca\_fuscata  
Macaca\_fascicularis Theropithecus\_gelada Papio\_hamadryas Papio\_cynocephalus  
Papio\_ursinus Papio\_anubis Mandrillus\_sphinx Cercocebus\_atys Chlorocebus\_aethiops  
Erythrocebus\_patas Miopithecus\_talapoin Semnopithecus\_entellus Trachypithecus\_johnii  
Nasalis\_larvatus Pygathrix\_nemaeus Presbytis\_thomasi Ptilocercus\_badius Colobus\_guereza  
Catopithecus\_browni Proteopithecus\_sylviae Homunculus\_patagonicus Leptadapis\_magnus  
Adapis\_parisiensis Cantius\_torresi Teilhardina\_belgica Northarctus\_ventricolus

;

END;

BEGIN TREES;

TRANSLATE

- 1 Galago\_senegalensis,
- 2 Otolemur\_garnettii,
- 3 Loris\_tardigradus,
- 4 Varecia\_variegata,
- 5 Lemur\_catta,
- 6 Hapalemur\_griseus,
- 7 Eulemur\_fulvus,
- 8 Eulemur\_mongoz,
- 9 Eulemur\_macaco,
- 10 Eulemur\_coronatus,
- 11 Eulemur\_rubriventer,
- 12 Microcebus\_murinus,
- 13 Indri\_indri,
- 14 Propithecus\_edwardsi,
- 15 Propithecus\_verreauxi,
- 16 Callicebus\_moloch,
- 17 Alouatta\_pigra,
- 18 Alouatta\_palliata,

19 Alouatta\_seneculus,  
20 Brachyteles\_hypoxanthus,  
21 Brachyteles\_arachnoides,  
22 Lagothrix\_lagotricha,  
23 Ateles\_geoffroyi,  
24 Ateles\_paniscus,  
25 Saimiri\_sciureus,  
26 Saimiri\_oerstedii,  
27 Saimiri\_boliviensis,  
28 Cebus\_apella,  
29 Cebus\_olivaceus,  
30 Saguinus\_fuscicollis,  
31 Leontopithecus\_rosalia,  
32 Callithrix\_jacchus,  
33 Callithrix\_pygmaea,  
34 Aotus\_trivirgatus,  
35 Pongo\_pygmaeus,  
36 Pan\_troglodytes,  
37 Pan\_paniscus,  
38 Gorilla\_gorilla,  
39 Symphalangus\_syndactylus,  
40 Hylobates\_pileatus,  
41 Hylobates\_agilis,  
42 Hylobates\_lar,  
43 Macaca\_sylvanus,  
44 Macaca\_nemestrina,  
45 Macaca\_mulatta,  
46 Macaca\_fuscata,  
47 Macaca\_fascicularis,  
48 Theropithecus\_gelada,  
49 Papio\_hamadryas,  
50 Papio\_cynocephalus,  
51 Papio\_ursinus,  
52 Papio\_anubis,  
53 Mandrillus\_sphinx,  
54 Cercocebus\_atys,  
55 Chlorocebus\_aethiops,  
56 Erythrocebus\_patas,  
57 Miopithecus\_talapoin,  
58 Semnopithecus\_entellus,  
59 Trachypithecus\_johnii,  
60 Nasalis\_larvatus,  
61 Pygathrix\_nemaeus,  
62 Presbytis\_thomasi,

63 Piliocolobus\_badius,  
64 Colobus\_guereza,  
65 Catopithecus\_browni,  
66 Proteopithecus\_sylviae,  
67 Homunculus\_patagonicus,  
68 Leptadapis\_magnus,  
69 Adapis\_parisiensis,  
70 Cantius\_torresi,  
71 Teilhardina\_belgica,  
72 Northarctus\_ventricolus;

TREE 'tree 1+++++++' =  
((((1:0.15424,2:0.154239):0.219241,3:0.37348000000000003):0.159386,((4:0.227883,((5:0.090545,6:0.090545):0.10682,(((7:0.056351,8:0.05635):0.008869,(9:0.057816,10:0.057816):0.007403):0.008732,11:0.073952):0.123414):0.030518):0.106967,(12:0.324026,(13:0.21206,(14:0.07302900000000001,15:0.07303):0.139031):0.111967):0.010823):0.198018):0.055134,((68:0.01,69:0.01):0.156001,(72:0.038001,70:0.01):0.01):0.01):0.03966,(71:0.028023,(66:0.097996,(((16:0.240312,(((17:0.025391,18:0.025391):0.016791,19:0.042183):0.130482,(((20:0.032681,21:0.032681):0.082851,22:0.115532):0.017714,(23:0.035505,24:0.035506):0.097741):0.039418):0.055489,(((25:0.008274,26:0.008274):0.011553,27:0.019826):0.160509,(28:0.067434,29:0.067434):0.11129):0.025303,((30:0.146636,(31:0.13928800000000002,(32:0.050905,33:0.050904):0.08838299999999999):0.007349):0.054989,34:0.201626):0.004012):0.022515):0.012159):0.01,67:0.070312):0.177684,(65:0.01,(((35:0.173188,((36:0.021921,37:0.021921):0.072787,38:0.094708):0.078479):0.029005,(39:0.063339,(40:0.037134,(41:0.028469999999999995,42:0.028469):0.008665):0.026205):0.138853):0.07507,(((43:0.046727,(44:0.038615,((45:0.017611,46:0.017611):0.010008,47:0.027619):0.010995):0.008113):0.032155,((48:0.0399,(49:0.012198,((50:0.007397,51:0.007397):0.003762,52:0.011159):0.001039):0.027700999999999996):0.028336,(53:0.046519000000000005,54:0.046518000000000004):0.021718):0.010646):0.020377,((55:0.056933000000000004,56:0.056933):0.019462,57:0.076395999999999999):0.022864):0.056418,(((58:0.019382,59:0.019382):0.056671000000000006,(60:0.058943999999999996,61:0.058943999999999996):0.017109):0.002503,62:0.078556):0.023016,(63:0.079526000000000001,64:0.079526):0.022046):0.054105):0.121586):0.072738):0.077995):0.01):0.148027):0.041639):0.045854;

end;

Table S1. Extant primate data <sup>1</sup>

| Species                   | Dominance         | Body Mass Ratio<br>[48,49] | Canine Ratio<br>[50-52] | Expected Estrus Overlap<br>[36] | Sex Ratio<br>[36] |
|---------------------------|-------------------|----------------------------|-------------------------|---------------------------------|-------------------|
| <i>Alouatta palliata</i>  | male[110]         | 1.3364                     | 1.51                    | 0.7                             | 0.25              |
| <i>Alouatta pigra</i>     | male <sup>2</sup> | 1.7729                     | 1.37                    |                                 |                   |
| <i>Alouatta seniculus</i> | male[111]         | 1.2841                     | 1.5                     | 0.1                             | 0.60              |
| <i>Aotus trivirgatus</i>  | co-dominance[112] | 1.1046                     | 1.08                    | 0                               | 1                 |
| <i>Ateles belzebuth</i>   | male[111]         | 1.0561                     |                         |                                 |                   |

|                                |                   |        |      |     |      |
|--------------------------------|-------------------|--------|------|-----|------|
| <i>Ateles geoffroyi</i>        | male[111]         | 1.0672 | 1.52 |     |      |
| <i>Ateles paniscus</i>         | male[111]         | 1.0794 | 1.57 | 9.6 | 0.31 |
| <i>Brachyteles arachnoides</i> | male[113]         | 1.2000 | 1.33 | 5.7 | 0.65 |
| <i>Brachyteles hypoxanthus</i> | co-dominance[111] | 1.1309 | 1.12 |     |      |
| <i>Cacajao rubicundus</i>      | male[114]         | 1.1979 |      |     |      |
| <i>Callicebus moloch</i>       | co-dominance[115] | 1.0669 | 1.08 | 0   | 1    |
| <i>Callicebus personatus</i>   | co-dominance[116] | 0.9203 |      |     |      |
| <i>Callithrix jacchus</i>      | co-dominance[117] | 0.9784 | 0.95 | 6.3 | 0.93 |
| <i>Cebuella pygmaea</i>        | female[118]       | 0.9016 | 1.03 | 0   | 1    |
| <i>Cebus albifrons</i>         | male[119]         | 1.3886 |      |     |      |
| <i>Cebus apella</i>            | male[120]         | 1.4484 | 1.41 | 1.2 | 0.87 |
| <i>Cebus capucinus</i>         | male[121]         | 1.4488 |      | 1.5 | 1.38 |
| <i>Cebus olivaceus</i>         | male[120]         | 1.3056 | 1.57 | 9.3 | 0.17 |
| <i>Cercocebus atys</i>         | male[122]         | 1.7742 | 2.46 |     |      |
| <i>Chlorocebus aethiops</i>    | male[107]         | 1.4295 | 1.51 | 92  | 0.70 |
| <i>Cercopithecus campbelli</i> | male[123]         | 1.6700 |      |     |      |
| <i>Colobus guereza</i>         | male[124]         | 1.4674 | 1.46 | 0.6 | 0.33 |
| <i>Erythrocebus patas</i>      | co-dominance[45]  | 1.9077 | 2.17 | 20  | 0.23 |
| <i>Eulemur coronatus</i>       | female[125]       | 1.0432 | 1.11 |     |      |
| <i>Eulemur fulvus</i>          | co-dominance[43]  | 0.9689 | 1.18 | 8.4 | 1.36 |
| <i>Eulemur macaco</i>          | female[126]       | 0.9442 | 1.02 | 5.1 | 0.91 |
| <i>Eulemur mongoz</i>          | female[127]       | 1.0124 | 1.2  | 0   | 1    |
| <i>Eulemur rubiventer</i>      | female[128]       | 1.0206 | 1.05 | 0   | 1    |
| <i>Galago senegalensis</i>     | male[129]         | 1.1407 | 1.11 |     |      |
| <i>Gorilla gorilla</i>         | male[130]         | 2.3832 | 1.73 | 0.2 | 0.41 |
| <i>Hapalemur griseus</i>       | female[131]       | 1.0930 | 1    | 0   | 1    |
| <i>Hylobates agilis</i>        | co-dominance[132] | 1.0103 | 1.08 |     |      |
| <i>Hylobates lar</i>           | co-dominance[132] | 1.1049 | 1.16 | 0   | 1    |
| <i>Hylobates muelleri</i>      | co-dominance[132] | 1.0673 |      |     |      |
| <i>Hylobates pileatus</i>      | co-dominance[132] | 1.0110 | 0.99 |     |      |
| <i>Hylobates syndactylus</i>   | co-dominance[133] | 1.1121 | 1.18 |     |      |
| <i>Indri Indri</i>             | female[134]       | 0.8523 | 1    | 0   | 1    |
| <i>Lagothrix lagothricha</i>   | male[111]         | 1.1634 | 1.77 | 4.3 | 0.34 |
| <i>Lemur catta</i>             | female[135]       | 1.0000 | 1.19 | 1.5 | 1.13 |
| <i>Leontopithecus rosalia</i>  | co-dominance[136] | 1.0368 | 1.18 | 2.9 | 1.33 |
| <i>Loris tardigradus</i>       | male[137]         | 0.9814 | 0.98 | 0   | 0.40 |
| <i>Macaca assamensis</i>       | male <sup>3</sup> | 1.6377 |      |     |      |
| <i>Macaca fascicularis</i>     | male[138]         | 1.4930 | 2.25 | 54  | 0.59 |
| <i>Macaca fuscata</i>          | male[139]         | 1.3699 | 1.94 | 97  | 0.33 |
| <i>Macaca mulatta</i>          | male[140]         | 1.2500 | 2.15 | 62  | 0.28 |
| <i>Macaca nemestrina</i>       | male[141]         | 1.7200 | 2.35 | 47  | 0.14 |

|                                |                           |        |      |     |      |
|--------------------------------|---------------------------|--------|------|-----|------|
| <i>Macaca radiata</i>          | male[142]                 | 1.7325 |      | 26  | 0.78 |
| <i>Macaca sylvanus</i>         | male <sup>4</sup>         | 1.4545 | 2.02 | 95  | 0.82 |
| <i>Macaca thibetana</i>        | male[143]                 | 1.6000 |      |     |      |
| <i>Mandrillus sphinx</i>       | male[144]                 | 2.4496 | 5.18 |     |      |
| <i>Microcebus murinus</i>      | female[27]                | 1.0575 | 0.99 | 0.2 | 0.57 |
| <i>Miopithecus talapoin</i>    | female[9,145]             | 1.2321 | 1.9  | 100 | 0.48 |
| <i>Nasalis larvatus</i>        | male[146]                 | 2.0774 | 2.2  |     |      |
| <i>Otolemur garnetti</i>       | female[147]               | 1.0817 | 1.08 | 0   | 1    |
| <i>Pan paniscus</i>            | co-dominance[148]         | 1.3554 | 1.38 | 14  | 1    |
| <i>Pan troglodytes</i>         | male[149]                 | 1.2671 | 1.43 | 76  | 0.29 |
| <i>Papio anubis</i>            | male[150]                 | 1.8872 | 2.22 | 31  | 0.41 |
| <i>Papio cynocephalus</i>      | male[151]                 | 1.7724 | 2.83 | 13  | 0.62 |
| <i>Papio hamadryas</i>         | male[152]                 | 1.7071 | 2.74 | 0.1 | 0.50 |
| <i>Papio papio</i>             | male[153]                 | 1.9167 |      |     |      |
| <i>Papio ursinus</i>           | male[154]                 | 2.0135 | 3.83 | 17  | 0.47 |
| <i>Pongo pygmaeus</i>          | male[107]                 | 2.1927 | 1.7  | 79  | 0.56 |
| <i>Presbytis thomasi</i>       | male[138]                 | 1.0120 | 1.8  |     |      |
| <i>Ptilocolobus badius</i>     | male[155]                 | 1.0183 | 1.88 | 14  | 0.50 |
| <i>Propithecus diadema</i>     | female[125]               | 0.9489 |      |     |      |
| <i>Propithecus edwardsi</i>    | female[156]               | 0.9649 | 0.88 | 0   | 1.07 |
| <i>Propithecus tattersalli</i> | female[125]               | 0.9443 |      |     |      |
| <i>Propithecus verreauxi</i>   | female[157]               | 0.9438 | 1.06 | 0.3 | 1    |
| <i>Pygathrix nemaeus</i>       | male[158]                 | 1.3033 | 2.02 |     |      |
| <i>Saguinas fuscicollis</i>    | co-dominance[159]         | 0.9581 | 1.03 | 0   | 1.90 |
| <i>Saimiri boliviensis</i>     | female[160]               | 1.2813 | 1.61 |     |      |
| <i>Saimiri oerstedii</i>       | male[161]                 | 1.3191 | 1.68 | 30  | 0.63 |
| <i>Saimiri sciureus</i>        | male[162]                 | 1.1767 | 1.41 | 45  | 0.30 |
| <i>Semnopithecus entellus</i>  | male[163]                 | 1.3145 | 1.7  | 6.4 | 0.32 |
| <i>Tarsius tarsier</i>         | co-dominance <sup>5</sup> | 1.1574 |      |     |      |
| <i>Theropithecus gelada</i>    | male[164]                 | 1.6239 | 3.22 | 1.4 | 0.25 |
| <i>Trachypithecus johnii</i>   | male[165]                 | 1.0714 | 1.63 |     |      |
| <i>Trachypithecus phayrei</i>  | male <sup>6</sup>         | 1.2492 |      |     |      |
| <i>Varecia variegata</i>       | female[166]               | 0.9886 | 1.04 | 0   | 0.50 |

<sup>1</sup> Numbers in brackets refer to references in the main body of the manuscript

<sup>2</sup> Sarie Van Belle Personal communication

<sup>3</sup> Sally Macdonald Personal communication

<sup>4</sup> Christopher Young Personal communication

<sup>5</sup> Sharon Gursky Personal communication

<sup>6</sup> Andreas Koenig and Carola Borries Personal communication

Table S2. Dermoptera and Scandentia body mass ratio data [62–64]

| Species                       | Body Mass Ratio |
|-------------------------------|-----------------|
| <i>Galeopterus variegatus</i> | 1               |
| <i>Cynocephalus volans</i>    | 1               |
| <i>Ptilocercus lowii</i>      | 0.92            |
| <i>Tupaia longipes</i>        | 1.01            |
| <i>Tupaia gracilis</i>        | 0.96            |
| <i>Tupaia minor</i>           | 1.04            |
| <i>Tupaia montana</i>         | 1.02            |
| <i>Tupaia tana</i>            | 0.94            |

Table S3: Fossil divergence dates and canine ratios.

| <b>Taxon</b>                    | <b>Fossil Age (mya)</b> | <b>Fossil Age (epoch)</b>                               | <b>Reference</b> | <b>Computed Divergence (mya)</b> | <b>Assigned Branch Length</b> | <b>Canine Ratio</b> | <b>Reference</b> |
|---------------------------------|-------------------------|---------------------------------------------------------|------------------|----------------------------------|-------------------------------|---------------------|------------------|
| <i>Leptadapis magnus</i>        | 41.2                    | Lutetian-Bartonian boundary (Eocene)                    | [79,167,168]     | 42.4                             | 1                             | 1.19                | [175]            |
| <i>Adapis parisiensis</i>       | 41.2                    | Lutetian-Bartonian boundary (Eocene)                    | [79,167,168]     | 42.2                             | 1                             | 1.13                | [175]            |
| <i>Cantius torresi</i> *        | 55.8                    | WA-0 (earliest Eocene)                                  | [169,170]        | 56.8                             | 1                             | 1.37                | [176]            |
| <i>Northarctus venticolus</i>   | 53                      | BR-0 (early Eocene)                                     | [170,171]        | 56.8                             | 3.8                           | 1.89                | [177]            |
| <i>Catopithecus browni</i>      | 34                      | Jebel Qatrani Formation (late Eocene - early Oligocene) | [172]            | 35                               | 1                             | 1.43                | [178]            |
| <i>Proteopithecus sylviae</i> * | 34                      | Jebel Qatrani Formation (late Eocene - early Oligocene) | [172]            | 43.8                             | 9.8                           | 1.28                | [178]            |
| <i>Homonculus patagonicus</i>   | 18                      | Santa Cruz Formation (Miocene)                          | [173]            | 25                               | 7                             | 1.28                | [179]            |
| <i>Teilhardina belgica</i> ~    | 55.8                    | WA-0 (earliest Eocene)                                  | [170,174]        | 58.6                             | 2.8                           | 1                   | [75,76]          |

\*Canine Ratio based on mandibular canines

~Canine Ratio not reported; Omomyiforms reported as monomorphic in canine ratio
